# Supplementary material for: Functional characterization of spectral tuning mechanisms in the great bowerbird short-wavelength sensitive visual pigment (SWS1), and the origins of UV/violet vision in passerines and parrots
Source: PubMed Central journal article supplement (PMC4029201; doi:10.1186/1471-2148-13-250), 2013-11-13
Supplement: 1471-2148-13-250-S1.pdf [file 1471-2148-13-250-S1.pdf]

## Supplementary data

### *Supplementary tables*

Table S1. Degenerate oligonucleotides for PCR (numbering according to bovine rhodopsin)

| Name          | Target opsin | Sequence 5' - 3'                   | Direction of primer | AA site |
|---------------|--------------|------------------------------------|---------------------|---------|
| AvesRH2_1018R | RH2          | gac gga sga gac ctc rgt ytt gct    | R                   | 1018    |
| AvesRH2_898R  | RH2          | tca tga gsa crt aga tga ygg ggt t  | R                   | 898     |
| AvesRH2_179F  | RH2          | tgg tca cct tca arc aca aga agc t  | F                   | 179     |
| AvesRH2_785R  | RH2          | gcr tag ggy gtc cag gcc agc at     | R                   | 785     |
| VertS2_103R   | SWS2         | aag tac ats tgg gag aag ctg ta     | R                   | 103     |
| VertS2_315R   | SWS2         | cga vcg gaa ctg ytk gtt cat        | R                   | 315     |
| VertS2_95F    | SWS2         | ttc tac agc ttc tcs cag atg tac tt | F                   | 95      |
| VertS2_22F    | SWS2         | agc ccn ttc ctg gtv ccs ca         | F                   | 22      |
| AvesS2_258R   | SWS2         | cac cat cac vay yac cat cyt sgt    | R                   | 258     |
| VertUV_243F   | SWS1         | acg cag aag gci gag mri gar gt     | F                   | 243     |
| VertUV_232F   | SWS1         | gcc gtg gcc gci car car car ga     | F                   | 232     |
| TetUV_187F    | SWS1         | tgc gcc cig act cct aya cn         | F                   | 187     |
| VertUV_230R   | SWS1         | ctg ctg cgc cgc iac igc nyk nag    | R                   | 237     |
| TetUV_239R    | SWS1         | tcc tgc tgc tgi gci gen acn gc     | R                   | 239     |
| AvesUV_306R   | SWS1         | gaa ctg ctt gtt cat raa rca rta    | R                   | 313     |
| VertUV_230F   | SWS1         | ctg cgc gcc gtc gci gen car ca     | F                   | 230     |
| AvesUV_306R   | SWS1         | gaa ctg ctt gtt cat raa rca rta    | R                   | 306     |

Table S2. Species names &amp; accession numbers for Landbird SWS1 data set used in ancestral reconstruction analysis:

| Order          | Family        | Species                             | Common Name                | Accession #           | Reference                     | Name used in phylogeny |
|----------------|---------------|-------------------------------------|----------------------------|-----------------------|-------------------------------|------------------------|
| Bucerotiformes | Upupidae      | <i>Upupa epops</i>                  | Eurasian hoopoe            | AY227191              | (Ödeen and Håstad 2003)       | Upupa                  |
| Coraciiformes  | Alcedinidae   | <i>Alcedo atthis</i>                | common kingfisher          | AY227169              | (Ödeen and Håstad 2003)       | Alcedo                 |
| Coraciiformes  | Coraciidae    | <i>Coracias garrulus</i>            | common roller              | AY227170              | (Ödeen and Håstad 2003)       | Coracias               |
| Piciformes     | Picidae       | <i>Dendrocopos major</i>            | great spotted woodpecker   | AY227184              | (Ödeen and Håstad 2003)       | Dendrocop              |
| Trogoniformes  | Trogonidae    | <i>Trogon curucui</i>               | blue-crowned trogon        | AY227190              | (Ödeen and Håstad 2003)       | Trogon                 |
| Falconiformes  | Falconidae    | <i>Falco peregrinus</i>             | peregrine falcon           | AY227157              | (Ödeen and Håstad 2003)       | Falco                  |
| Passeriformes  | Corvidae      | <i>Corvus corone cornix</i>         | hooded crow                | AY227176              | (Ödeen and Håstad 2003)       | CorvusC                |
| Passeriformes  | Corvidae      | <i>Pica pica</i>                    | Eurasian magpie            | GQ305970              | (Ödeen and Håstad 2009)       | Pica                   |
| Passeriformes  | Vireonidae    | <i>Cyclarhis gujanensis</i>         | rufous-browed peppershrike | HE601826              | (Ödeen, et al. 2011)          | Cyclarhis              |
| Passeriformes  | Oriolidae     | <i>Oriolus oriolus</i>              | Eurasian golden oriole     | HE601828              | (Ödeen, et al. 2011)          | Oriolus                |
| Passeriformes  | Paradisaeidae | <i>Ptiloris magnificus</i>          | magnificent riflebird      | HE601835              | (Ödeen, et al. 2011)          | Ptiloris               |
| Passeriformes  | Corvidae      | <i>Corvus frugilegus</i>            | rook                       | DQ451006              | Browne et al. (Genbank 2006)  | CorvusF                |
| Passeriformes  | Campephagidae | <i>Coracina novaehollandiae</i>     | black-faced cuckooshrike   | HE601825              | (Odeen, et al. 2012)          | Coracina               |
| Passeriformes  | Dicruridae    | <i>Dicrurus bracteatus</i>          | spangled drongo            | HE601829              | (Odeen, et al. 2012)          | Dicrurus               |
| Passeriformes  | Corvidae      | <i>Cyanocorax chrysops</i>          | plush-crested jay          | HE601832              | (Odeen, et al. 2012)          | Cyanocora              |
| Passeriformes  | Dicruridae    | <i>Rhipidura fuliginosa</i>         | New Zealand fantail        | HM159132              | Hauber & Chong (GenBank 2010) | Rhipidura              |
| Passeriformes  | Callaetidae   | <i>Creadion carunculatus</i>        | saddleback                 | HM159129              | Hauber & Chong (GenBank 2010) | Creadion               |
| Passeriformes  | Meliphagidae  | <i>Lichenostomus flavescens</i>     | yellow-tinted honeyeater   | GQ305955              | (Ödeen and Håstad 2009)       | Lichenost              |
| Passeriformes  | Maluridae     | <i>Acanthorhynchus tenuirostris</i> | eastern spinebill          | GQ305959              | (Ödeen and Håstad 2009)       | Acanthorh              |
| Passeriformes  | Maluridae     | <i>Malurus grayi</i>                | broad-billed fairywren     | HE588093              | (Odeen, et al. 2012)          | MalurusG               |
| Passeriformes  | Maluridae     | <i>Malurus cyanocephalus</i>        | emperor fairywren          | HE588094              | (Odeen, et al. 2012)          | MalarusCy              |
| Passeriformes  | Maluridae     | <i>Malurus amabilis</i>             | loverly fairywren          | HE588095              | (Odeen, et al. 2012)          | MalarusA               |
| Passeriformes  | Maluridae     | <i>Malurus elegans</i>              | red-winged fairywren       | HE588099              | (Odeen, et al. 2012)          | MalurusE               |
| Passeriformes  | Maluridae     | <i>Malurus splendens musgravi</i>   | turquoise fairywren        | HE588101              | (Odeen, et al. 2012)          | MalurusS               |
| Passeriformes  | Maluridae     | <i>Malurus coronatus</i>            | purple-crowned fairywren   | HE588108,<br>HE588109 | (Odeen, et al. 2012)          | MalurusCo              |
| Passeriformes  | Maluridae     | <i>Malurus melanocephalus</i>       | red-backed fairywren       | HE588111-<br>HE588113 | (Odeen, et al. 2012)          | MalurusM               |
| Passeriformes  | Maluridae     | <i>Malurus leucopterus edouradi</i> | white-winged fairywren     | HE588114-<br>HE588116 | (Odeen, et al. 2012)          | MalurusL               |
| Passeriformes  | Maluridae     | <i>Clytomias insignis</i>           | orange crowned fairywren   | HE588121              | (Odeen, et al. 2012)          | Clytomya               |
| Passeriformes  | Maluridae     | <i>Amytorins barbatus</i>           | grey grasswren             | HE588123              | (Odeen, et al. 2012)          | Amytomis               |
| Passeriformes  | Acanthizidae  | <i>Gerygone igata</i>               | grey gerygone              | HM159130,             | Hauber & Chong (GenBank)      | Gerygone               |

|               |                   |                                 |                          | HM159131              | 2010)                            |           |
|---------------|-------------------|---------------------------------|--------------------------|-----------------------|----------------------------------|-----------|
| Passeriformes | Menuridae         | <i>Menura novaehollandiae</i>   | superb lyrebird          | HE601819              | (Ödeen, et al. 2011)             | Menura    |
| Passeriformes | Ptilonorhynchidae | <i>Sericulus chrysocephalus</i> | regent catbird           | HE588091              | (Ödeen, et al. 2011)             | Sericulus |
| Passeriformes | Pomatostomidae    | <i>Pomatostomus temporalis</i>  | grey-crowned babbler     | HE601820              | (Ödeen, et al. 2011)             | PomatostT |
| Passeriformes | Pomatostomidae    | <i>Pomatostomus ruficeps</i>    | chestnut-crowned babbler | HE601821              | (Ödeen, et al. 2011)             | PomatostR |
| Passeriformes | Orthonychidae     | <i>Orthonyx temminckii</i>      | Australian logrunner     | HE601822              | (Ödeen, et al. 2011)             | Orthonyx  |
| Passeriformes | Cnemophilidae     | <i>Cnemophilus loriae</i>       | Loria's satinbird        | HE601823              | (Ödeen, et al. 2011)             | Cnemophil |
| Passeriformes | Melanocharitidae  | <i>Toxorhamphus poliopterus</i> | slaty-headed longbill    | HE601824              | (Ödeen, et al. 2011)             | Toxorham  |
| Passeriformes | Ptilonorhynchidae | <i>Chlamydera nuchalis</i>      | great bowerbird          |                       | This Study                       | Chlamyder |
| Passeriformes | Sittidae          | <i>Sitta europaea</i>           | Eurasian nuthatch        | HE601851,<br>HE601852 | (Ödeen, et al. 2011)             | Sitta     |
| Passeriformes | Sturnidae         | <i>Sturnus vulgaris</i>         | common starling          | AY227180              | (Ödeen and Håstad 2003)          | Sturnus   |
| Passeriformes | Muscicapidae      | <i>Luscinia svecica</i>         | bluethroat               | AY274225              | Raman & Andersson (Genbank 2003) | LusciniaS |
| Passeriformes | Muscicapidae      | <i>Luscinia calliope</i>        | Siberian rubythroat      | AY274226              | Raman & Andersson (Genbank 2003) | LusciniaC |
| Passeriformes | Mimidae           | <i>Mimus saturninus</i>         | chalk-browed mockingbird | GQ305972              | (Ödeen and Håstad 2009)          | Mimus     |
| Passeriformes | Turdidae          | <i>Turdus iliacus</i>           | redwing                  | HE601854              | (Ödeen, et al. 2011)             | Turdus    |
| Passeriformes | Paridae           | <i>Parus caeruleus</i>          | blue tit                 | AY274220              | Raman & Andersson (Genbank 2003) |           |
| Passeriformes | Paridae           | <i>Parus major</i>              | great tit                | AY274221              | Raman & Andersson (Genbank 2003) | Parus     |
| Passeriformes | Paridae           | <i>Parus palustris</i>          | marsh tit                | AY274222              | Raman & Andersson (Genbank 2003) |           |
| Passeriformes | Passeridae        | <i>Taeniopygia guttata</i>      | zebra finch              | AF222331              | (Yokoyama, et al. 2000)          | Taeniopyg |
| Passeriformes | Fringillidae      | <i>Serinus canaria</i>          | common canary            | AJ277922              | (Das, et al. 1999)               | Serinus   |
| Passeriformes | Passeridae        | <i>Euplectes afer</i>           | yellow crowned bishop    | AY274223              | Raman & Andersson (Genbank 2003) | Euplectes |
| Passeriformes | Estrilidae        | <i>Amadina fasciata</i>         | cut-throat finch         | FJ440639              | (Ödeen and Håstad 2009)          | Amadina   |
| Passeriformes | Estrilidae        | <i>Lonchura maja</i>            | white-headed munia       | FJ440641              | (Ödeen and Håstad 2009)          | Lonchura  |
| Passeriformes | Passeridae        | <i>Neochmia modesta</i>         | plum-headed finch        | FJ440642              | (Ödeen and Håstad 2009)          | Neichima  |
| Passeriformes | Nectariniidae     | <i>Cinnyris pulchellus</i>      | beautiful sunbird        | GQ305964              | (Ödeen and Håstad 2009)          | Cinnyris  |
| Passeriformes | Motacillidae      | <i>Anthus cervinus</i>          | red-throated pipit       | HE601865              | (Ödeen, et al. 2011)             | Anthus    |
| Passeriformes | Icteridae         | <i>Sturnella neglecta</i>       | Western meadowlark       | HE601868              | (Ödeen, et al. 2011)             | Sturnella |
| Passeriformes | Phylloscopidae    | <i>Phylloscopus trochilus</i>   | willow warbler           | AY227181              | (Ödeen and Håstad 2003)          | Phyllosco |
| Passeriformes | Timaliidae        | <i>Leiothrix lutea</i>          | red-billed leiothrix     | FJ440645              | (Ödeen and Håstad 2009)          | Leiothrix |
| Passeriformes | Hirundinidae      | <i>Hirundo rustica</i>          | barn swallow             | HE601843              | (Ödeen, et al. 2011)             | Hirundo   |
| Passeriformes | Donacobiidae      | <i>Donacobius atricapilla</i>   | black-capped donacobius  | HE601848              | (Ödeen, et al. 2011)             | Donacobiu |
| Passeriformes | Zosteropidae      | <i>Zosterops lateralis</i>      | silver-eye               | HM159125              | Hauber & Chong (GenBank 2010)    | Zosterops |
| Passeriformes | Petroicidae       | <i>Petroica rosea</i>           | rose robin               | HE601839              | (Ödeen, et al. 2011)             | PetroicaR |

|                |                 |                                          |                                  |          |                               |           |
|----------------|-----------------|------------------------------------------|----------------------------------|----------|-------------------------------|-----------|
| Passeriformes  | Acanthisittidae | <i>Acanthisitta chloris</i>              | rifleman                         | HM159126 | Hauber & Chong (GenBank 2010) | Acanthisi |
| Passeriformes  | Pittidae        | <i>Hydrornis elliotii</i>                | bar-bellied pitta                | HE601813 | (Ödeen, et al. 2011)          | Pitta     |
| Passeriformes  | Thamnophilidae  | <i>Myrmeciza hemimelaena</i>             | southern chestnut-tailed antbird | GQ924591 | (Seddon, et al. 2010)         | Myrmeciza |
| Passeriformes  | Thamnophilidae  | <i>Phlegopsis nigromaculata</i>          | black-spotted bare-eye           | GQ924592 | (Seddon, et al. 2010)         | Phlegopsi |
| Passeriformes  | Pipridae        | <i>Manacus manacus</i>                   | white-bearded manakin            | AY227182 | (Ödeen and Håstad 2003)       | Manacus   |
| Passeriformes  | Tityridae       | <i>Onychorhynchus coronatus</i>          | Amazonian royal flycatcher       | HE601817 | (Ödeen, et al. 2011)          | Onychorhy |
| Passeriformes  | Tyrannidae      | <i>Myiarchus tyrannulus</i>              | brown-crested flycatcher         | AY227183 | (Ödeen and Håstad 2003)       | Myiarchus |
| Passeriformes  | Tyrannidae      | <i>Camptostoma obsoletum</i>             | southern beardless tyrannulet    | HE601814 | (Ödeen, et al. 2011)          | Camptosto |
| Passeriformes  | Tyrannidae      | <i>Xolmis irupero</i>                    | white monjita                    | HE601815 | (Ödeen, et al. 2011)          | Xolmis    |
| Passeriformes  | Tyrannidae      | <i>Tyrannus savana</i>                   | fork-tailed flycatcher           | HE601816 | (Ödeen, et al. 2011)          | Tyrannus  |
| Psittaciformes | Cacatuidae      | <i>Calyptorhynchus latirostris</i>       | Carnaby's black cockatoo         | HM150800 | (Carvalho, et al. 2011)       | Calyptorh |
| Psittaciformes | Cacatuidae      | <i>Eolophus roseicapilla</i>             | galah                            | HM150801 | (Carvalho, et al. 2011)       | Elophus   |
| Psittaciformes | Cacatuidae      | <i>Cacatua galerita</i>                  | sulphur-crested cockatoo         | HM150802 | (Carvalho, et al. 2011)       | Cacatua   |
| Psittaciformes | Psittacidae     | <i>Ara macao</i>                         | scarlet macaw                    | HM150792 | (Carvalho, et al. 2011)       | AraM      |
| Psittaciformes | Psittacidae     | <i>Amazona versicolor</i>                | St. Lucia amazon                 | HM150793 | (Carvalho, et al. 2011)       | Amazona   |
| Psittaciformes | Psittacidae     | <i>Ara ararauna</i>                      | blue-and-yellow macaw            | HM150803 | (Carvalho, et al. 2011)       | AraA      |
| Psittaciformes | Psittacidae     | <i>Psittacus erithacus</i>               | grey parrot                      | HM150804 | (Carvalho, et al. 2011)       | Psittacus |
| Psittaciformes | Psittacidae     | <i>Ara chloropterus</i>                  | red-and-green macaw              | HM150805 | (Carvalho, et al. 2011)       | AraC      |
| Psittaciformes | Psittacidae     | <i>Anodorhynchus hyacinthinus</i>        | hyacinth macaw                   | HM150806 | (Carvalho, et al. 2011)       | Anodorhyn |
| Psittaciformes | Psittacidae     | <i>Platycercus elegans</i>               | crimson rosella                  | HM150794 | (Carvalho, et al. 2011)       | Platycerc |
| Psittaciformes | Psittacidae     | <i>Barnardius zonarius semitorquatus</i> | Twenty eight parrot              | HM150799 | (Carvalho, et al. 2011)       | Barnardiu |
| Psittaciformes | Psittacidae     | <i>Melopsittacus undulatus</i>           | budgerigar                       | Y11787   | (Wilkie, et al. 1998)         | Melopsitt |
| Psittaciformes | Strigopidae     | <i>Nestor notabilis</i>                  | Kea                              | HM150807 | (Carvalho, et al. 2011)       | Nestor    |

Table S3. Likelihood scores of codon models used for ancestral reconstruction

| Model |    | lnL       |
|-------|----|-----------|
| codon | M7 | -865.7970 |
|       | M8 | -865.7973 |

Table S4. Maximum likelihood ancestral reconstruction of ancestral passerine/parrot, an passerine SWS1 pigments, with posterior probabilities (numbering according to bovine rhodo

| AA#       | Passerine/parrot |          |           |               | Passerine  |              |           |               |
|-----------|------------------|----------|-----------|---------------|------------|--------------|-----------|---------------|
|           | codon            | PP       | AA        | PP            | codon      | PP           | AA        | PP            |
| 72        | CTC              | 1        | (L        | 1.000)        | CTC        | 1            | (L        | 1.000)        |
| 73        | AAC              | 1        | (N        | 1.000)        | AAC        | 1            | (N        | 1.000)        |
| 74        | TAC              | 1        | (Y        | 1.000)        | TAC        | 1            | (Y        | 1.000)        |
| 75        | ATC              | 1        | (I        | 1.000)        | ATC        | 0.998        | (I        | 1.000)        |
| 76        | CTG              | 1        | (L        | 1.000)        | CTG        | 1            | (L        | 1.000)        |
| 77        | GTG              | 1        | (V        | 1.000)        | GTG        | 1            | (V        | 1.000)        |
| 78        | AAC              | 1        | (N        | 1.000)        | AAC        | 1            | (N        | 1.000)        |
| 79        | ATC              | 1        | (I        | 1.000)        | ATC        | 0.998        | (I        | 1.000)        |
| 80        | TCC              | 1        | (S        | 1.000)        | TCC        | 1            | (S        | 1.000)        |
| 81        | TTC              | 1        | (F        | 1.000)        | TTC        | 0.997        | (F        | 0.999)        |
| 82        | AGC              | 1        | (S        | 1.000)        | AGC        | 0.999        | (S        | 1.000)        |
| 83        | GGC              | 1        | (G        | 1.000)        | GGC        | 1            | (G        | 1.000)        |
| 84        | TTC              | 1        | (F        | 1.000)        | TTC        | 0.998        | (F        | 1.000)        |
| 85        | CTG              | 1        | (L        | 1.000)        | CTG        | 0.978        | (L        | 1.000)        |
| <b>86</b> | <b>TCC</b>       | <b>1</b> | <b>(S</b> | <b>1.000)</b> | <b>TGC</b> | <b>0.999</b> | <b>(C</b> | <b>0.999)</b> |
| 87        | TGC              | 1        | (C        | 1.000)        | TGC        | 1            | (C        | 1.000)        |
| 88        | ATC              | 1        | (I        | 1.000)        | ATC        | 0.998        | (I        | 1.000)        |
| 89        | TTC              | 1        | (F        | 1.000)        | TTC        | 0.998        | (F        | 1.000)        |
| <b>90</b> | <b>AGC</b>       | <b>1</b> | <b>(S</b> | <b>1.000)</b> | <b>AGC</b> | <b>1</b>     | <b>(S</b> | <b>1.000)</b> |
| 91        | GTC              | 1        | (V        | 1.000)        | GTC        | 0.999        | (V        | 1.000)        |
| 92        | TTC              | 1        | (F        | 1.000)        | TTC        | 0.998        | (F        | 1.000)        |
| 93        | ACC              | 1        | (T        | 1.000)        | ACC        | 1            | (T        | 1.000)        |
| 94        | GTC              | 1        | (V        | 1.000)        | GTC        | 0.999        | (V        | 1.000)        |
| 95        | TTC              | 1        | (F        | 1.000)        | TTC        | 0.998        | (F        | 1.000)        |
| 96        | GTC              | 1        | (V        | 1.000)        | GTC        | 0.999        | (V        | 1.000)        |
| 97        | TCC              | 1        | (S        | 1.000)        | TCC        | 1            | (S        | 1.000)        |
| 98        | AGC              | 1        | (S        | 1.000)        | AGC        | 0.999        | (S        | 1.000)        |
| 99        | TCC              | 1        | (S        | 1.000)        | TCC        | 0.832        | (S        | 0.832)        |
| 100       | CAG              | 1        | (Q        | 1.000)        | CAG        | 1            | (Q        | 1.000)        |
| 101       | GGC              | 1        | (G        | 1.000)        | GGA        | 0.571        | (G        | 1.000)        |

## Supplementary figures

Figure S1. Alignment of SWS1 opsin gene, helix 2 from Landbirds used in ancestral reconstruction, highlighting sites 86, 90 &amp; 93.

|           | 7                              | 8 | 8 | 9 | 9 | 1 |   | 7                              | 8 | 8 | 9 | 9 | 1 |   |   |   |   |   |   |   |   |   |   |   |   |     |   |   |   |   |
|-----------|--------------------------------|---|---|---|---|---|---|--------------------------------|---|---|---|---|---|---|---|---|---|---|---|---|---|---|---|---|---|-----|---|---|---|---|
|           | 234567890123456789012345678901 |   |   |   |   | 0 |   | 234567890123456789012345678901 |   |   |   |   | 0 |   |   |   |   |   |   |   |   |   |   |   |   |     |   |   |   |   |
| Alcedo    | L                              | N | Y | I | L | V | N | I                              | S | F | S | G | F | L | C | I | F | S | V | F | T | V | F | V | S | S   | Q | G |   |   |
| Coracias  | L                              | N | Y | I | L | V | N | I                              | S | F | S | G | F | L | C | I | F | S | V | F | T | V | F | V | S | S   | Q | G |   |   |
| Dendrocop | L                              | N | Y | I | L | V | N | I                              | S | F | S | G | F | L | C | I | F | S | V | F | T | V | F | V | S | S   | Q | G |   |   |
| Trogon    | L                              | N | Y | I | L | V | N | I                              | S | L | G | G | F | I | F | C | V | F | S | V | F | T | V | F | V | S   | S | Q | G |   |
| Upupa     | L                              | N | Y | I | L | V | N | I                              | S | F | S | G | F | M | S | C | I | F | S | V | F | T | V | F | V | S   | S | Q | G |   |
| Falco     | --                             | Y | I | L | V | N | I | S                              | F | S | G | F | L | C | I | F | S | V | F | ? | V | F | V | S | S | Q   | G |   |   |   |
| Acanthisi | L                              | N | Y | I | L | V | N | I                              | S | L | S | G | L | L | C | C | I | L | C | V | F | L | V | F | V | A   | S | T | Q | G |
| Manacus   | -                              | N | Y | I | L | V | N | I                              | S | F | S | G | F | L | C | I | F | S | V | F | T | V | F | V | S | S   | Q | G |   |   |
| Myrmeciza | L                              | N | Y | I | L | V | N | I                              | S | F | S | G | F | L | C | I | F | S | V | F | T | V | F | V | S | S   | Q | G |   |   |
| Phlegopsi | L                              | N | Y | I | L | V | N | I                              | S | F | S | G | F | L | C | I | F | S | V | F | T | V | F | V | S | S   | Q | G |   |   |
| Pitta     | L                              | N | Y | I | L | V | N | I                              | S | F | S | G | F | L | C | I | F | S | V | F | T | V | F | V | S | S   | Q | G |   |   |
| Myiarchus | L                              | N | Y | I | L | V | N | I                              | S | V | S | G | F | M | C | I | F | S | V | F | T | V | F | V | S | S   | Q | G |   |   |
| Camptosto | L                              | N | Y | I | L | V | N | I                              | S | V | S | G | F | M | C | I | F | S | V | F | T | V | F | V | S | S   | Q | G |   |   |
| Xolmis    | L                              | N | Y | I | L | V | N | I                              | S | V | S | G | F | M | C | I | F | S | V | F | T | V | F | V | S | S   | Q | G |   |   |
| Tyrannus  | --                             | Y | I | L | V | N | I | S                              | V | S | G | F | M | C | I | F | S | V | F | T | V | F | V | S | S | Q   | G |   |   |   |
| Onychorhy | L                              | N | Y | I | L | V | N | I                              | S | V | S | G | F | F | C | I | F | S | V | F | T | V | F | V | S | S   | Q | G |   |   |
| Menura    | -----                          | N | I | S | V | S | G | F                              | F | C | I | F | C | V | F | T | V | F | V | S | ? | Q | G |   |   |     |   |   |   |   |
| Sericulus | L                              | N | Y | I | L | V | N | I                              | S | F | S | G | F | L | C | I | F | S | V | F | T | V | F | V | S | S   | Q | G |   |   |
| Chlamyder | L                              | N | Y | I | L | V | N | I                              | S | F | S | G | F | L | C | I | F | S | V | F | T | V | F | V | S | S   | Q | G |   |   |
| PomatostT | L                              | N | Y | I | L | V | N | I                              | S | F | S | G | F | L | C | I | F | S | V | F | T | V | F | V | S | S   | Q | G |   |   |
| PomatostR | L                              | N | Y | I | L | V | N | I                              | S | F | S | G | F | L | C | I | F | S | V | F | T | V | F | V | S | S   | Q | G |   |   |
| Orthonyx  | L                              | N | Y | I | L | V | N | I                              | S | V | S | G | F | F | C | I | F | C | V | F | T | V | F | V | S | S   | Q | G |   |   |
| Cnemophil | L                              | N | Y | I | L | V | N | I                              | S | I | S | G | L | M | C | I | F | S | V | F | T | V | F | V | S | S   | Q | G |   |   |
| Toxorhamp | L                              | N | Y | I | L | V | N | I                              | S | V | S | G | L | M | C | C | I | F | T | V | F | V | S | S | Q | G   |   |   |   |   |
| Lichenost | L                              | N | Y | I | L | V | N | I                              | S | F | A | G | F | M | C | I | F | S | V | F | T | V | F | V | S | S   | Q | G |   |   |
| Acanthorh | L                              | N | Y | I | L | V | N | I                              | S | F | A | G | F | M | C | I | F | S | V | F | T | V | F | V | S | S   | Q | G |   |   |
| MalurusA  | L                              | N | Y | I | L | V | N | I                              | S | F | S | G | F | L | C | I | F | C | I | F | T | V | F | V | S | S   | Q | G |   |   |
| MalurusE  | L                              | N | Y | I | L | V | N | I                              | S | F | S | G | F | L | C | I | F | C | I | F | T | V | F | V | S | S   | Q | G |   |   |
| MalurusCy | -----                          | N | I | S | F | S | G | F                              | L | C | I | F | C | I | F | T | V | F | V | S | S | Q | G |   |   |     |   |   |   |   |
| MalurusS  | L                              | N | Y | I | L | V | N | I                              | S | F | S | G | F | L | C | I | F | C | I | F | T | V | F | V | S | S   | Q | G |   |   |
| MalurusM  | L                              | N | Y | I | L | V | N | I                              | S | F | S | G | F | L | C | I | F | S | V | F | T | V | F | V | S | S   | Q | G |   |   |
| MalurusL  | L                              | N | Y | I | L | V | N | I                              | S | F | S | G | F | L | C | I | F | S | V | F | T | V | F | V | S | S   | Q | G |   |   |
| MalurusCo | L                              | N | Y | I | L | V | N | I                              | S | F | S | G | F | L | C | I | F | S | V | F | T | V | F | V | S | S   | Q | G |   |   |
| MalurusG  | --                             | Y | I | L | V | N | I | S                              | F | S | G | F | L | C | I | F | S | V | F | T | V | F | V | S | S | Q   | G |   |   |   |
| Clytomyia | L                              | N | Y | I | L | V | N | I                              | S | F | S | G | F | L | C | I | F | S | V | F | T | V | F | V | S | S   | Q | G |   |   |
| Amytornis | ---                            | I | L | V | N | I | S | F                              | S | G | F | L | C | I | F | S | V | F | T | V | F | V | S | S | Q | G   |   |   |   |   |
| Gerygone  | -----                          | N | I | S | F | S | G | F                              | M | C | I | F | S | V | F | T | V | F | V | S | S | Q | G |   |   |     |   |   |   |   |
| Creadion  | -----                          | N | I | S | V | S | G | L                              | M | C | C | I | F | T | V | F | V | S | S | Q | G |   |   |   |   |     |   |   |   |   |
| Rhipidura | L                              | N | Y | I | L | V | N | I                              | S | F | S | G | F | L | C | I | F | S | V | F | T | V | F | V | S | S   | Q | G |   |   |
| CorvusC   | -                              | N | Y | I | L | V | N | I                              | S | F | S | G | F | M | C | I | F | S | V | F | T | V | F | ? | S | --- | Q | G |   |   |
| CorvusF   | L                              | N | Y | I | L | V | N | I                              | S | F | S | G | F | L | C | I | F | S | V | F | T | V | F | I | S | S   | Q | G |   |   |
| Pica      | L                              | N | Y | I | L | V | N | I                              | S | F | S | G | F | L | C | I | F | S | V | F | T | V | F | I | S | S   | Q | G |   |   |
| Cyclarhis | L                              | N | Y | I | L | ? | N | ?                              | S | V | S | G | L | M | C | C | V | F | C | I | F | T | V | F | V | A   | S | S | Q | G |
| Coracina  | L                              | N | Y | I | L | V | N | V                              | S | F | S | G | F | L | C | I | F | S | V | F | T | V | F | V | S | S   | Q | G |   |   |
| Oriolus   | L                              | N | Y | I | L | V | N | V                              | S | F | S | G | F | L | C | I | F | S | V | F | T | V | F | V | S | S   | Q | G |   |   |
| Dicrurus  | L                              | N | Y | I | L | V | N | I                              | S | F | S | G | F | L | C | I | F | S | V | F | T | V | F | V | S | S   | Q | G |   |   |
| Cyanocora | --                             | Y | I | L | V | N | I | S                              | F | S | G | F | L | C | I | F | S | V | F | T | V | F | V | S | S | Q   | G |   |   |   |
| Ptiloris  | L                              | N | Y | I | L | V | N | I                              | S | F | S | G | F | L | C | I | F | S | V | F | T | V | F | V | S | S   | Q | G |   |   |
| PetroicaR | -----                          | N | I | S | V | S | G | L                              | M | C | C | I | F | C | L | F | T | V | F | I | S | S | Q | G |   |     |   |   |   |   |
| Parus     | L                              | N | Y | I | L | V | N | I                              | S | V | S | G | L | M | C | C | V | F | C | I | F | T | V | F | V | S   | S | Q | G |   |
| Sitta     | L                              | N | Y | I | L | V | N | I                              | S | V | S | G | L | M | C | C | I | F | C | I | F | T | V | F | I | S   | S | Q | G |   |
| Turdus    | L                              | N | Y | I | L | V | N | I                              | S | V | S | G | L | M | C | C | V | F | C | I | F | T | V | F | V | S   | S | Q | G |   |
| Sturnus   | -----                          | N | I | S | V | S | G | L                              | M | C | C | I | F | C | I | F | T | V | F | V | S | S | Q | G |   |     |   |   |   |   |
| Mimus     | ---                            | L | V | N | I | S | V | S                              | G | L | M | C | C | I | F | T | V | F | V | S | ? | S | Q | G |   |     |   |   |   |   |
| LusciniaS | L                              | N | Y | I | L | V | N | I                              | S | V | S | G | L | M | C | C | V | F | C | I | F | T | V | F | V | S   | S | Q | G |   |
| LusciniaC | L                              | N | Y | I | L | V | N | I                              | S | V | S | G | L | M | C | C | V | F | C | I | F | T | V | F | V | S   | S | Q | G |   |
| Phyllosco | L                              | N | Y | I | L | V | N | I                              | S | V | S | G | L | M | M | C | I | F | C | I | F | T | V | F | V | S   | S | Q | G |   |
| Hirundo   | L                              | N | Y | I | L | V | N | I                              | S | V | S | G | L | M | M | C | I | F | C | I | F | T | V | F | V | S   | S | Q | G |   |
| Donacobiu | --                             | Y | I | L | V | N | I | S                              | V | S | G | L | M | M | C | I | F | C | I | F | T | V | F | V | S | S   | Q | G |   |   |
| Leiothrix | -----                          | N | I | S | V | S | G | L                              | M | M | C | C | V | F | C | I | F | T | V | F | V | S | S | Q | G |     |   |   |   |   |
| Zosterops | -----                          | N | I | S | V | S | G | L                              | M | M | C | I | F | C | I | F | ? | V | F | V | S | S | Q | G |   |     |   |   |   |   |
| Cinnyris  | L                              | N | Y | I | L | V | N | I                              | S | V | S | G | L | M | C | C | V | F | C | I | F | T | V | F | V | S   | S | Q | G |   |
| Serinus   | L                              | N | Y | I | L | V | N | I                              | S | V | S | G | L | M | C | C | V | F | C | I | F | T | V | F | V | A   | S | S | Q | G |
| Sturnella | L                              | N | Y | I | L | V | N | I                              | S | V | S | G | L | M | C | C | V | F | C | I | F | T | V | F | V | A   | S | S | Q | G |
| Anthus    | L                              | N | Y | I | L | V | N | I                              | S | V | S | G | L | M | C | C | V | F | C | I | F | T | V | F | V | S   | S | Q | G |   |
| Lonchura  | L                              | N | Y | I | L | V | N | I                              | S | V | A | G | L | M | C | C | V | F | C | I | F | T | V | F | I | A   | S | S | Q | G |
| Amadina   | -                              | N | Y | I | L | V | N | I                              | S | V | S | G | L | M | C | C | V | F | C | I | F | T | V | F | V | A   | S | S | Q | G |
| Taeniopyg | L                              | N | Y | I | L | V | N | I                              | S | V | S | G | L | M | C | C | V | F | C | I | F | T | V | F | I | A   | S | S | Q | G |
| Euplectes | L                              | N | Y | I | L | V | N | I                              | S | V | S | G | L | M | C | C | V | F | C | I | F | T | V | F | V | A   | S | S | Q | G |
| Neochmia  | L                              | N | Y | I | L | V | N | I                              | S | V | S | G | L | M | C | C | V | F | C | I | F | T | V | F | I | A   | S | S | Q | G |
| Cacatua   | L                              | N | Y | I | L | V | N | I                              | S | F | C | G | F | L | A | C | I | F | C | I | F | T | V | F | V | S   | S | Q | G |   |
| Eolophus  | L                              | N | Y | I | L | V | N | I                              | S | F | C | G | F | L | A | C | I | F | C | I | F | T | V | F | V | S   | S | Q | G |   |
| Calyptorh | L                              | N | Y | I | L | V | N | I                              | S | F | C | G | F | L | A | C | I | F | C | I | F | T | V | F | V | S   | S | Q | G |   |
| Psittacus | L                              | N | Y | I | L | V | N | I                              | S | F | C | G | F | L | A | C | I | F | C | I | F | T | V | F | V | S   | S | Q | G |   |
| AraA      | L                              | N | Y | I | L | V | N | I                              | S | F | C | G | F | L | A | C | I | F | C | I | F | T | V | F | V | S   | S | Q | G |   |
| AraM      | L                              | N | Y | I | L | V | N | I                              | S | F | C | G | F | L | A | C | I | F | C | I | F | T | V |   |   |     |   |   |   |   |

Figure S2. Alignment of visual pigment sequences in *C. nuchalis*. The seven transmembrane domains (TMD) are indicated by gray shading. Key functional sites are highlighted in black. All site numbers are according to corresponding sites in bovine rhodopsin. The sequence of the SWS2 gene is missing 6 amino acids at 5' end. The intron locations of SWS1, as determined by genomic PCR, are at residues G119, R177-Y178, V233 and Q312-F313 (underlined and in bold).

```

                                TMD I
SWS1 M-----DEDEFYLFKNQSSVGPWDG---PQYHIAPMFAFYLQTI F MGVV F VVGTPLNAIVLIVTVRYK [ 66]
RH1  M-----NGTEGQDFYVPMSNKTGVVRS PF EYPQY YLAEPWKFSALAA YMFMLILLGFPINFL TLYVTIQHK [ 66]
RH2  M-----NGTEGINFYVPMSNKTGVVRS PF EYPQY YLAEPWKYRLVCCYIFFLISTGFPINFL TLLVTFKHK [ 66]
LWS  MATWDGAVFAARRRHDDDDTTRDSVFTY TNSNTRGPFEGPNYHIAPRWVYNL TSLWMI FVVVASVFTNGLV LVATAKFK [ 66]
SWS2 -----?????RDELP?DFYISAALDAPNLTALSPFLV P QTHLGS PGVFRAMA AFMFL LIALGVPVNAL TVVCTAKYK [ 66]

                                TMD II                                TMD III
SWS1 KLRQPLNYILVNI SFSGFLCCIFSVFTV FVSSAQGYFVFGKHMCALEBGFAGATGGLVTGWSLAF LAFERYIV ICKPFGNF [146]
RH1  KLRTPLNYILLNLAVANLFMVFGGFTTMYTSMNGYFVFGVTCGYIEGFFATLGGEIALWLSLVVLA IERYVVVCKPMSNF [146]
RH2  KLRQPLNYILVNLAVADLCMACFGFTVTFYTAWNGYFVFGPIGCAVEGFFATLGGQVALWLSLVVLA IERYIV ICKPMSNF [146]
LWS  KLRHPLNWILVNLAVADLGETVIASTISVVNQIFGYFILGHPMCIIIEGYTVSACGITALWSLAI ISWERWFV VCKPFGNI [146]
SWS2 KLRSHLNYILVNLAVANLLVVCVGGSTTAFYSFSQMYFALGPTACKVIEGFAATLGGMVSLWLSLAVVA FERFLV ICKPLGNF [146]

                                TMD IV                                TMD V
SWS1 RFSRHALLVVAATWVIGISVAIPPLFGWSRYVPEGLQCSGCPDWYTVGTKYKSEYYTWFLFIFCFIVPLSLI IFSYSQL [226]
RH1  RFGENHAILGVAFSWIMALACAAPPLFGWSRYIPEGMCSCGIDYYTLKPEVNNE SFVIYMFVVHFMIPLLI IFFCYGNL [226]
RH2  RFSASHAMMGIVFTWVMAISCAAPPLFGWSRYIPEGMCSCGPDYTHNPDFHNESYVLYMFVIHF IIPVII IFFSYGRL [226]
LWS  KFDGKLAVAGVLFVSWIWSCAWTAPP IFGWSRYWPHGLKISCGPDVFSGSTDPGVQSYMVVLMVTCCLFPLSVI IFCYLQV [226]
SWS2 TFRGSHAVLGCAITWIFGLIASAPPLFGWSRYIPEGLOCSGCPDWYTTDNKWNNE SYVIFLFCFCFGFPLAVIVLSYGR L [226]

                                TMD VI                                TMD VII
SWS1 LSALRAVAAQQQESATTQKAEREVSRMVVVMVGSFCLCYVPYAALAMYVNNRDHGLDLRLVTVPAFFSKSACVYNPIIY [306]
RH1  VCTVKEAAAQQQESATTQKAKEVTRMVIIMVIAFLICWVPYASVAFYIFFTNQSDFGPIFMTIPAFFAKSSAIYNPIY [306]
RH2  VCKVREAAAQQQESATTQKAKEVTRMVIILMVLGFM L AWTPYAVVAFWIFFTNGADFTATLMAVPAFFSKSSLYNPIIY [306]
LWS  WLAI RAVAAQQQES ESTQKAKEVSRMVVVMILAYIFCWGPYTFACFAAANPGYAFHPLTAALPAFFAKSATIYNPIIY [306]
SWS2 LLTLRAVAKQQEQSAT TQKAEREVTKMVVVMVLGFLVCWAPYSAFALWVVT HRGRHFVGLASIPSVFSKASTVYNPIY [306]

SWS1 CFM NKQFRACIMETVC-GR-PMTDDSEMSSSAQ-RTEVSSVSSSQVSPS* [ 356]
RH1  IVMNKQFRNCMI T T LCCGKNPLGDEDTSAG----KTETSSVSTSQVSPA* [ 356]
RH2  VLMNKHFRNCMNTTFCCGKNPFGDEDTSSTVSHNKTEVSSVSSSQVSPA* [ 356]
LWS  VFMNRQFRNCILQLF--GKKV--DDGSEVSTS--RTEVSSVSNSSVSPA* [ 356]
SWS2 VFMNKQFRSCM?KLVFCGRSPFGDDDDVSGSSQ-ATQVSSVSSSQVSPA* [ 356]

```

Figure S3. Phylogenetic relationships of the *C. nuchalis* opsin genes with those of other vertebrates. Opsin sequences isolated in this study from the great bowerbird are highlighted in yellow. These were aligned with other sequences obtained from NCBI using ClustalW and subjected to phylogenetic analyses. Maximum likelihood methods were implemented in the program PHYML 3.0 (Guindon and Gascuel 2003; Guindon, et al. 2005), and Bayesian inference in MrBayes 3.2.1 (Ronquist and Huelsenbeck 2003), both under the HKY+I+  $\Gamma$  model, favoured under the Akaike Information Criterion (AIC) using MrModeltest2.3 (Nylander 2008). For ML and NJ analyses, bootstrapping methods (100 replicates) were used to assess the degree of confidence in nodes of the phylogeny (Felsenstein 1985). The Bayesian analysis was run for 3 million generations, sampling every 100, and a 25% burn-in. Shown is the ML bootstrap consensus tree with both ML and NJ support values. An asterisk denotes a posterior probability of  $\geq 0.95$  in the Bayesian analysis.

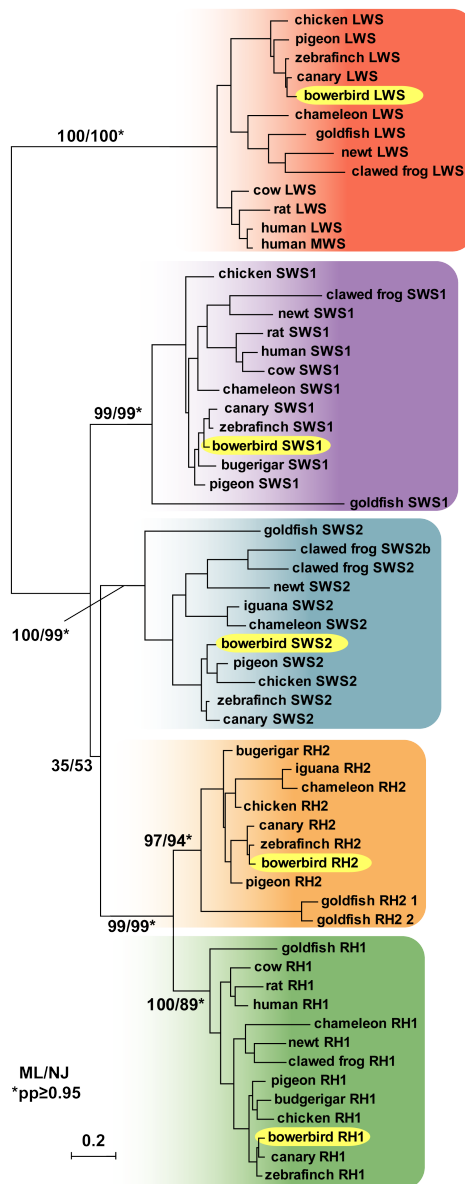





## References

- Barker F, Cibois A, Schikler P, Feinstein J, Cracraft J 2004. Phylogeny and diversification of the largest avian radiation. *Proc Natl Acad Sci U S A* 101: 11040-11045.
- Barker FK, Barrowclough GF, Groth JG 2002. A phylogenetic hypothesis for passerine birds: taxonomic and biogeographic implications of an analysis of nuclear DNA sequence data. *Proc Biol Sci* 269: 295-308.
- Beresford P, Barker FK, Ryan PG, Crowe TM 2005. African endemics span the tree of songbirds (Passeri): molecular systematics of several evolutionary 'enigmas'. *Proc Biol Sci* 272: 849-858.
- Carvalho LS, Knott B, Berg ML, Bennett AT, Hunt DM 2011. Ultraviolet-sensitive vision in long-lived birds. *Proc Biol Sci* 278: 107-114.
- Das D, Wilkie SE, Hunt DM, Bowmaker JK 1999. Visual pigments and oil droplets in the retina of a passerine bird, the canary *Serinus canaria*: microspectrophotometry and opsin sequences. *Vision Res* 39: 2801-2815.
- Driskell AC, Norman JA, Pruett-Jones S, Mangall E, Sonsthagen S, Christidis L 2011. A multigene phylogeny examining evolutionary and ecological relationships in the Australo-papuan wrens of the subfamily Malurinae (Aves). *Molecular Phylogenetics and Evolution* 60: 480-485.
- Felsenstein J 1985. Confidence limits on phylogenies: an approach using the bootstrap. *Evolution* 39: 783-791.
- Gardner JL, Trueman JWH, Ebert D, Joseph L, Magrath RD 2010. Phylogeny and evolution of the Meliphagoidea, the largest radiation of Australasian songbirds. *Molecular Phylogenetics and Evolution* 55: 1087-1102.
- Guindon S, Gascuel O 2003. A simple, fast, and accurate algorithm to estimate large phylogenies by maximum likelihood. *Syst Biol* 52: 696-704.
- Guindon S, Lethiec F, Duroux P, Gascuel O 2005. PHYML Online--a web server for fast maximum likelihood-based phylogenetic inference. *Nucleic Acids Res* 33: W557-559.
- Hackett SJ, Kimball RT, Reddy S, Bowie RC, Braun EL, Braun MJ, Chojnowski JL, Cox WA, Han KL, Harshman J, Huddleston CJ, Marks BD, Miglia KJ, Moore WS, Sheldon FH, Steadman DW, Witt CC, Yuri T 2008. A phylogenomic study of birds reveals their evolutionary history. *Science* 320: 1763-1768.
- Irestedt M, Ohlson JI 2008. The division of the major songbird radiation into Passerida and 'core Corvoidea' (Aves: Passeriformes) — the species tree vs. gene trees. *Zoologica Scripta* 37: 305-313.
- Johansson US, Fjeldså J, Bowie RCK 2008. Phylogenetic relationships within Passerida (Aves: Passeriformes): a review and a new molecular phylogeny based on three nuclear intron markers. *Molecular Phylogenetics and Evolution* 48: 858-876. doi: 10.1016/j.ympev.2008.05.029
- Jønsson KA, Fabre P-H, Ricklefs RE, Fjeldså J 2011. Major global radiation of corvoid birds originated in the proto-Papuan archipelago. *Proc Natl Acad Sci U S A* 108: 2328-2333.
- Lee JY, Joseph L, Edwards SV 2012. A species tree for the Australo-Papuan Fairy-wrens and allies (Aves: Maluridae). *Syst Biol* 61: 253-271.
- Nylander J. 2008. MrModeltest v2.3 Program distributed by the author Evolutionary Biology Centre, Uppsala Sweden.
- Ödeen A, Håstad O 2003. Complex distribution of avian color vision systems revealed by sequencing the SWS1 opsin from total DNA. *Mol Biol Evol* 20: 855-861.
- Ödeen A, Håstad O 2009. New primers for the avian SWS1 pigment opsin gene reveal new amino acid configurations in spectral sensitivity tuning sites. *J Hered* 100: 784-789.

- Ödeen A, Håstad O, Alström P 2011. Evolution of ultraviolet vision in the largest avian radiation - the passerines. *Bmc Evolutionary Biology* 11: 313.
- Ödeen A, Pruett-Jones S, Driskell AC, Armenta JK, Hastad O 2012. Multiple shifts between violet and ultraviolet vision in a family of passerine birds with associated changes in plumage coloration. *Proc Biol Sci* 279: 1269-1276.
- Ronquist F, Huelsenbeck JP 2003. MrBayes 3: Bayesian phylogenetic inference under mixed models. *Bioinformatics* 19: 1572-1574.
- Seddon N, Tobias JA, Eaton M, Odeen A 2010. Human Vision Can Provide a Valid Proxy for Avian Perception of Sexual Dichromatism. *Auk* 127: 283-292.
- Suh A, Paus M, Kiefmann M, Churakov G, Franke FA, Brosius J, Kriegs JO, Schmitz J 2011. Mesozoic retroposons reveal parrots as the closest living relatives of passerine birds. *Nature Communications* 2: 443.
- Wang N, Braun EL, Kimball RT 2012. Testing hypotheses about the sister group of the passeriformes using an independent 30-locus data set. *Mol Biol Evol* 29: 737-750.
- Wilkie SE, Vissers PM, Das D, Degrip WJ, Bowmaker JK, Hunt DM 1998. The molecular basis for UV vision in birds: spectral characteristics, cDNA sequence and retinal localization of the UV-sensitive visual pigment of the budgerigar (*Melopsittacus undulatus*). *Biochemistry Journal* 330 ( Pt 1): 541-547.
- Wright TF, Schirtzinger EE, Matsumoto T, Eberhard JR, Graves GR, Sanchez JJ, Capelli S, Müller H, Scharpegge J, Chambers GK, Fleischer RC 2008. A multilocus molecular phylogeny of the parrots (Psittaciformes): support for a Gondwanan origin during the cretaceous. *Mol Biol Evol* 25: 2141-2156.
- Yokoyama S, Blow NS, Radlwimmer FB 2000. Molecular evolution of color vision of zebra finch. *Gene* 259: 17-24.
